# Supplementary material for: Doubly Randomized Preference Trial of Prolonged Exposure Versus Sertraline for Treatment of PTSD
Source: Atypon-hosted journal article supplement (doi:10.1176/appi.ajp.2018.17090995), 2018-10-19
Supplement: appi.ajp.2018.17090995.ds001.pdf [file appi.ajp.2018.17090995.ds001.pdf]

**FIGURE S1. Pattern of Across-Session Change for Prolonged Exposure and Sertraline**

**A. Acute Outcome PTSD Severity (PSS-SR): PE versus Sertraline**

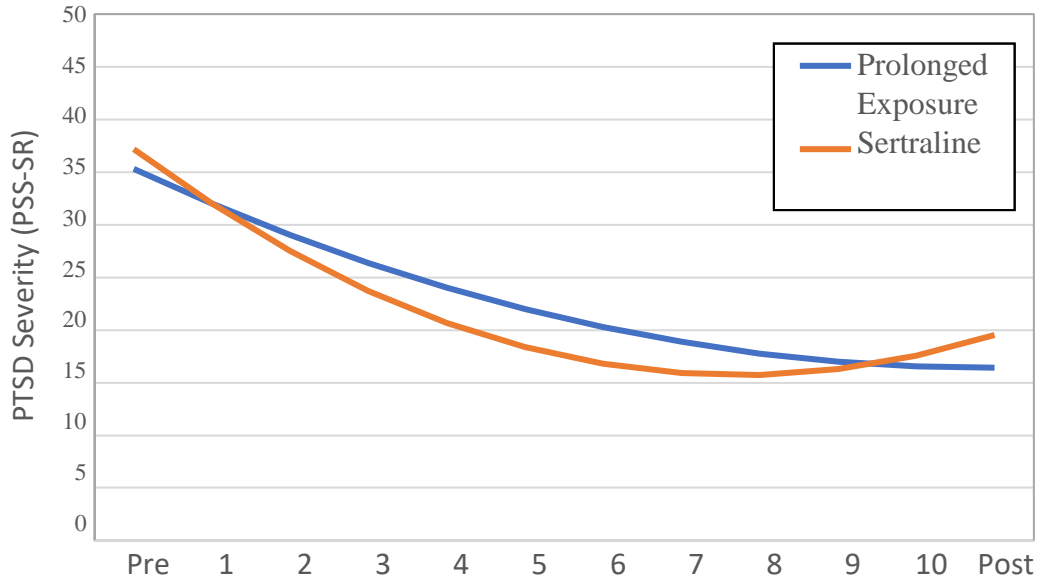

**B. Acute Outcome Depression Severity (BDI): PE versus Sertraline**

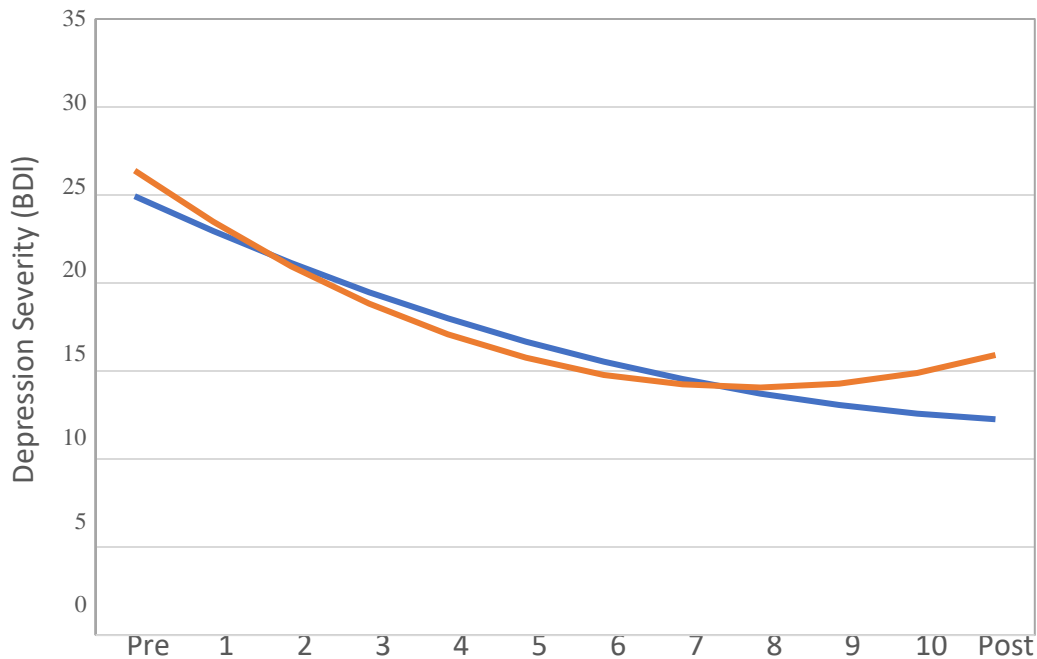

C. Acute Outcome Anxiety Severity (STAI): PE versus Sertraline

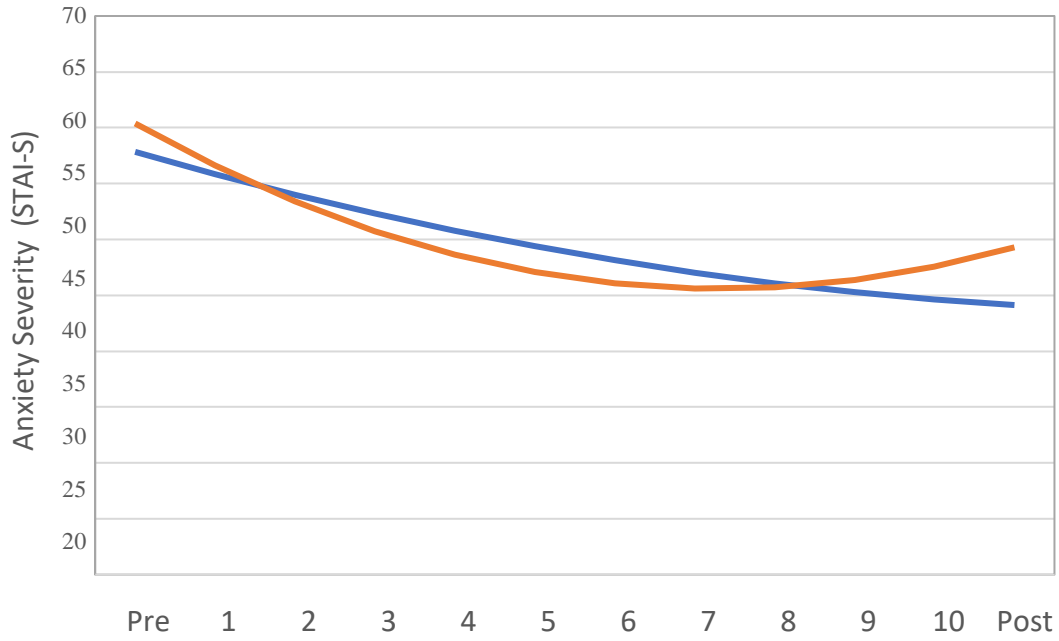

D. Acute Outcome Sheehan Disability Scale (SDS): PE versus Sertraline

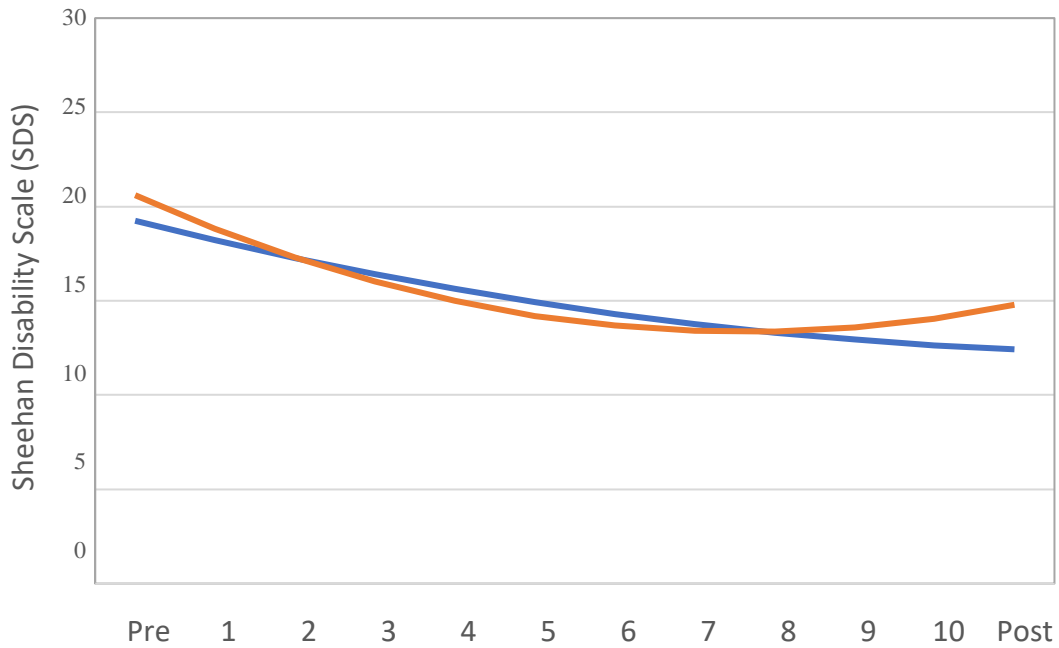

**TABLE S1. Intent-to-Treat Mean, SD, and Effects Sizes for Treatment Choice versus No Choice**

| Choice                                         | Pre-Treatment |               |       |              | Post-Treatment |               |      |              |
|------------------------------------------------|---------------|---------------|-------|--------------|----------------|---------------|------|--------------|
|                                                | <i>M</i>      | <i>95% CI</i> | %     | ( <i>n</i> ) | <i>M</i>       | <i>95% CI</i> | %    | ( <i>n</i> ) |
| PTSD Symptom Scale-Interview                   | 29.5          | 29.2-29.8     |       |              | 10.9           | 9.9-11.9      |      |              |
| PTSD Symptom Scale-Self Report                 | 33.6          | 32.0-35.2     |       |              | 13.4           | 11.3-15.5     |      |              |
| PTSD Diagnosis                                 |               |               | 100.0 | (97)         |                |               | 28.9 | (28)         |
| Responder Status                               |               |               | 0.0   | (0)          |                |               | 73.2 | (71)         |
| Hamilton Rating Scale Depression <sub>24</sub> | 24.3          | 23.9-24.7     |       |              | 12.2           | 11.7-12.7     |      |              |
| Beck Depression Inventory                      | 24.0          | 22.1-25.9     |       |              | 10.0           | 8.2-11.9      |      |              |
| Spielberger State Anxiety Inventory-State      | 56.4          | 54.5-58.3     |       |              | 40.6           | 38.4-42.8     |      |              |
| Sheehan Disability Scale                       | 18.9          | 17.6-20.2     |       |              | 11.8           | 10.1-13.5     |      |              |
| <b>No Choice</b>                               |               |               |       |              |                |               |      |              |
|                                                | <i>M</i>      | <i>95% CI</i> | %     | ( <i>n</i> ) | <i>M</i>       | <i>95% CI</i> | %    | ( <i>n</i> ) |
| PTSD Symptom Scale-Interview                   | 29.7          | 29.4-30.0     |       |              | 12.5           | 11.2-13.8     |      |              |
| PTSD Symptom Scale-Self Report                 | 34.8          | 33.4-36.2     |       |              | 15.4           | 12.8-18.0     |      |              |
| PTSD Diagnosis                                 |               |               | 100.0 | (103)        |                |               | 44.7 | (46)         |
| Responder Status                               |               |               | 0.00  | (0)          |                |               | 57.3 | (59)         |
| Hamilton Rating Scale Depression <sub>24</sub> | 23.1          | 22.7-23.5     |       |              | 12.6           | 12.1-13.1     |      |              |
| Beck Depression Inventory                      | 25.4          | 23.5-27.3     |       |              | 11.1           | 8.7-13.5      |      |              |
| Spielberger State Anxiety Inventory-State      | 56.5          | 54.4-58.6     |       |              | 41.9           | 39.1-44.7     |      |              |
| Sheehan Disability Scale                       | 18.6          | 17.4-19.8     |       |              | 10.8           | 9.2-12.4      |      |              |

*Note.* Responder Status = PSSI ≤ 24 and CGI < 4; Loss of Diagnosis = Does not meet DSM-IV symptom criteria. Means and 95% CIs were generated from the mixed effect models. Data for outcomes measures are estimated using the intent-to-treat analysis (*N* = 200). For PTSD Diagnosis,  $\chi^2(1, N = 200) = 5.35, p = .02$ , and for Responder Status,  $\chi^2(1, N = 200) = 5.56, p = .02$ . All other analyses between Choice and No Choice were not significant.
